# Supplementary material for: Singlet-assisted diffusion-NMR (SAD-NMR): redefining the limits when measuring tortuosity in porous media
Source: Royal Society of Chemistry journal article supplement (doi:10.1039/c8cp00145f), 2018-01-01

## Supplementary Information for:

# Singlet-assisted diffusion-NMR (SAD-NMR): redefining the limits when measuring tortuosity in porous media

Monique C. Tourell<sup>1</sup>, Ionut-Alexandru Pop<sup>1‡</sup>, Lynda J. Brown<sup>1</sup>, Richard C. D. Brown<sup>1</sup>, Giuseppe Pileio<sup>1\*</sup>

<sup>1</sup>Chemistry, University of Southampton, SO17 1BJ, Southampton, UK.

<sup>‡</sup>Current address: Concept Life Sciences, CT13 9ND, Sandwich, UK.

## S1. Synthesis of water-soluble <sup>13</sup>C<sub>2</sub> labelled perdeuterated naphthalene derivative 1 (labeled as I in the main paper)

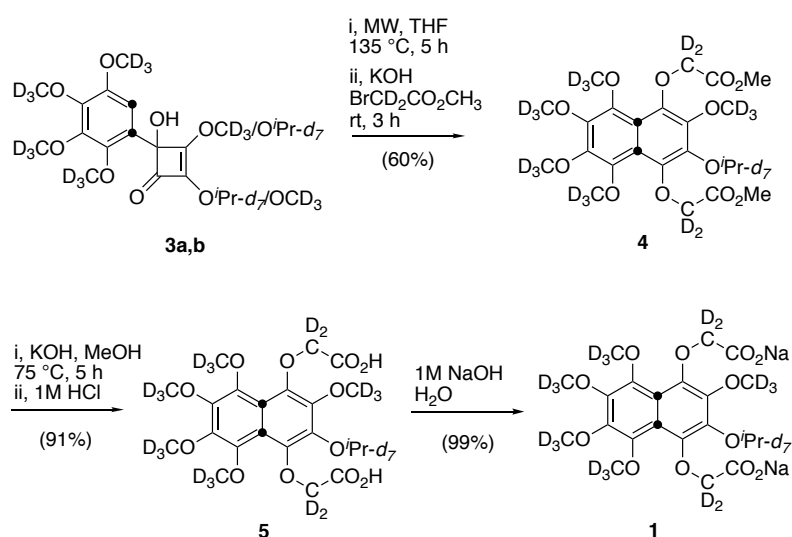

### S1.1 General Experimental

All air/moisture sensitive reactions were carried out under an inert atmosphere (N<sub>2</sub> or Ar), using oven or flame-dried glassware. THF (from Na/benzophenone) was distilled before use. All other solvents and reagents were used as received from standard chemical suppliers unless otherwise stated. TLC was performed on aluminium plates pre-coated with silica gel 60 with an F<sub>254</sub> indicator; visualised under UV light (254 nm) and/or by staining with KMnO<sub>4</sub> (10% aq.). Flash column chromatography was performed with Merck Kieselgel 60 silica gel. Fourier-transform infrared (FT-IR) spectra are reported in wavenumbers (cm<sup>-1</sup>) and were collected on a Nicolet 380 spectrometer fitted with a Diamond platform, as solids or neat liquids. <sup>1</sup>H NMR

and  $^{13}\text{C}$  NMR spectra were recorded in  $\text{CDCl}_3$  solutions using Bruker DPX400, Bruker AVII-400 or AVIIIHD-400 (400 and 100 MHz respectively) spectrometers. Chemical shifts are reported in  $\delta$  units using  $\text{CHCl}_3$  ( $\delta$  7.27 ppm  $^1\text{H}$ ,  $\delta$  77.0 ppm  $^{13}\text{C}$ ) as internal standards.  $^2\text{H}$  NMR spectra were recorded in  $\text{CHCl}_3$  or  $\text{H}_2\text{O}$  solutions using a Bruker AVIIIHD-500 (76.8 MHz  $^2\text{H}$ ) spectrometer. Chemical shifts are reported in  $\delta$  units using  $\text{CDCl}_3$  as an internal standard ( $\delta$  7.27 ppm  $^2\text{H}$ ). Coupling constants (J) are reported in Hz and are rounded to the nearest 0.1 Hz. Matching coupling constants are corrected. High-resolution mass spectra (HRMS) were obtained using a MaXis (Bruker Daltonics, Bremen, Germany) mass spectrometer equipped with a Time of Flight (TOF) analyser. HRMS were recorded using positive ion electrospray ionisation ( $\text{ESI}^+$ ).

### S1.2 Dimethyl-2,2'-((1,2,3,4,6-pentakis(methoxy- $d_3$ )-7-(propan-2-yl- $d_7$ )naphthalene-5,8-diyl)bis(oxy))diacetate-4a,8a- $^{13}\text{C}_2$ (4)

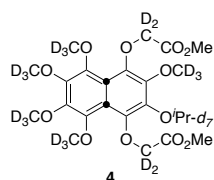

A solution of cyclobutenones **3a** and **3b** (1:1, 300 mg, 0.39 mmol) in THF (3 mL) was purged with  $\text{N}_2$  atm and sonicated for 30 min, then heated under microwave irradiation in a sealed tube at  $135^\circ\text{C}$  for 5 h. The reaction mixture was diluted with THF (15 mL), treated with KOH (94 mg, 1.68 mmol) and methyl bromoacetate-2,2- $d_2$  (0.18 mL, 1.91 mmol) and stirred at rt for 1 h. The mixture was filtered and the solvent removed *in vacuo*. Purification by column chromatography eluting with  $\text{Et}_2\text{O}$ :petroleum ether (20:80) afforded the title compound **4** as a white solid (250 mg, 0.46 mmol, 60%).  $R_f$  0.41 (eluent  $\text{EtOAc}$ /hexane 1:1); mp  $85\text{--}87^\circ\text{C}$ ; FT-IR  $\nu_{\text{max}}$  2983, 2937, 2856, 1764, 1743, 1588, 1446, 1382, 1351  $\text{cm}^{-1}$ ;  $^1\text{H}$  NMR (400 MHz,  $\text{CDCl}_3$ )  $\delta$  3.85 (3H, s), 3.84 (3H, s) ppm;  $^{13}\text{C}$  NMR (100 MHz,  $\text{CDCl}_3$ )  $\delta$  118.22, 188.20 ppm; LRMS ( $\text{ESI}^+$ )  $m/z$  541.5  $[\text{M}+\text{H}]^+$ , 563.4  $[\text{M}+\text{Na}]^+$ ; HRMS ( $\text{ESI}^+$ ) for  $\text{C}_{22}^{13}\text{C}_2\text{H}_7\text{D}_{26}\text{O}_{12}$   $[\text{M}+\text{H}]^+$  calcd 541.3666, found 541.3673.

### S1.3 2,2'-((1,2,3,4,6-Pentakis(methoxy- $d_3$ )-7-(propan-2-yl- $d_7$ )naphthalene-5,8-diyl)bis(oxy)) diacetic acid-4a,8a- $^{13}\text{C}_2$ (5)

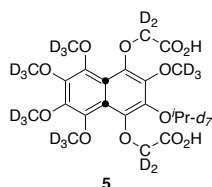

To a suspension of diester **4** (220 mg, 0.41 mmol) in MeOH (5 mL) was added KOH (114 mg, 2.04 mmol) in one portion and the reaction heated at 75 °C for 5 h, then concentrated *in vacuo*. The white residue was dissolved in H<sub>2</sub>O (5 mL) and washed with EtOAc (3 x 5 mL) to remove any organic impurities. The aqueous phase was acidified to pH 2 with 1M HCl and extracted with EtOAc (3 x 5 mL). The combined organic phases were dried (Na<sub>2</sub>SO<sub>4</sub>) and concentrated *in vacuo* to afford the title compound **5** as white solid (190 mg, 0.37 mmol, 91%).

Mp 148–150 °C; FT-IR  $\nu_{\text{max}}$  3115, 1765, 1769, 1588, 1467, 1403, 1362, 1191, 1091 cm<sup>-1</sup>; <sup>2</sup>H NMR (76.8 MHz, CHCl<sub>3</sub>)  $\delta$  4.79 (s, 4D), 4.55 (s, 1D), 4.01 (s, 6D), 3.97 (s, 3D), 3.93 (s, 3D), 3.90 (s, 3D), 1.35 (s, 6D) ppm; <sup>13</sup>C NMR (100 MHz, CDCl<sub>3</sub>)  $\delta$  116.76 ppm; LRMS (ESI<sup>+</sup>) *m/z* 513.6 [M+H]<sup>+</sup>, 535.4 [M+Na]<sup>+</sup>; HRMS (ESI<sup>+</sup>) for C<sub>20</sub><sup>13</sup>C<sub>2</sub>H<sub>3</sub>D<sub>26</sub>O<sub>12</sub> [M+H]<sup>+</sup> calcd 513.3353, found 513.3356.

#### S1.4 Sodium-2,2'-((1,2,3,4,6-pentakis(methoxy-*d*<sub>3</sub>)-7-(propan-2-yl-*d*<sub>7</sub>)naphthalene-5,8-diyl)bis (oxy))diacetate-4a,8a-<sup>13</sup>C<sub>2</sub> (**1**)

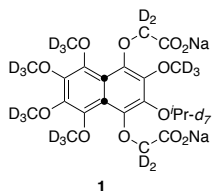

To neat diacid **5** (230 mg, 0.45 mmol) was added NaOH (0.92 mL of a 1M solution in H<sub>2</sub>O, 0.92 mmol) turning the suspension from white to a pale pink colour. The reaction mixture was concentrated *in vacuo* to afford the title compound **1** as a pale pink solid (250 mg, 0.45 mmol, 100%). Mp >290 °C; FT-IR  $\nu_{\text{max}}$  3350, 1606, 1586, 1396, 1359, 1187, 1089, 1020, 969 cm<sup>-1</sup>; <sup>2</sup>H NMR (76.8 MHz, H<sub>2</sub>O) 4.78 (s, 2D), 4.30 (s, 1D), 3.93 (s, 9D), 3.81 (s, 6D), 3.28 (s, 2D), 1.25 (s, 6D) ppm; <sup>13</sup>C NMR (100 MHz, H<sub>2</sub>O)  $\delta$  118.57 ppm.

**S1.5  $^1\text{H}$  NMR (400 MHz,  $\text{CDCl}_3$ ) Dimethyl-2,2'-((1,2,3,4,6-pentakis(methoxy- $d_3$ )-7-(propan-2-yl- $d_7$ )naphthalene-5,8-diyl)bis (oxy))diacetate-4a,8a- $^{13}\text{C}_2$  (4)**

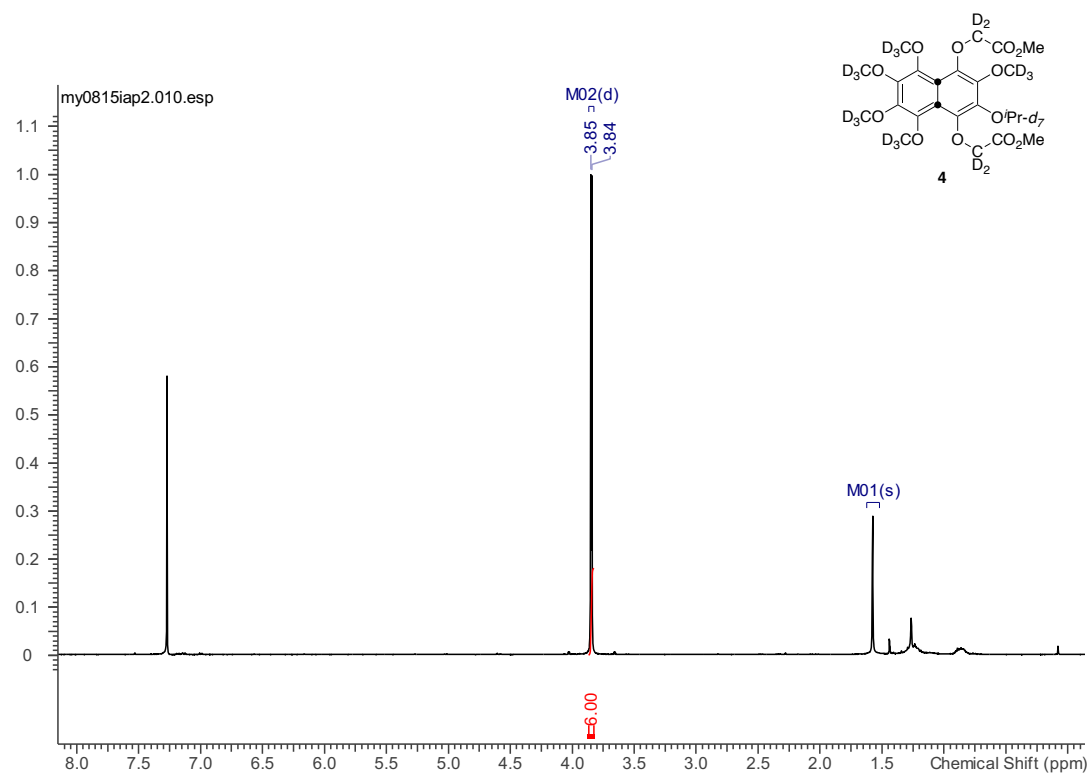

**S1.6  $^{13}\text{C}$  NMR (100 MHz,  $\text{CDCl}_3$ ) Dimethyl-2,2'-((1,2,3,4,6-pentakis(methoxy- $d_3$ )-7-(propan-2-yl- $d_7$ )naphthalene-5,8-diyl)bis (oxy))diacetate-4a,8a- $^{13}\text{C}_2$  (4)**

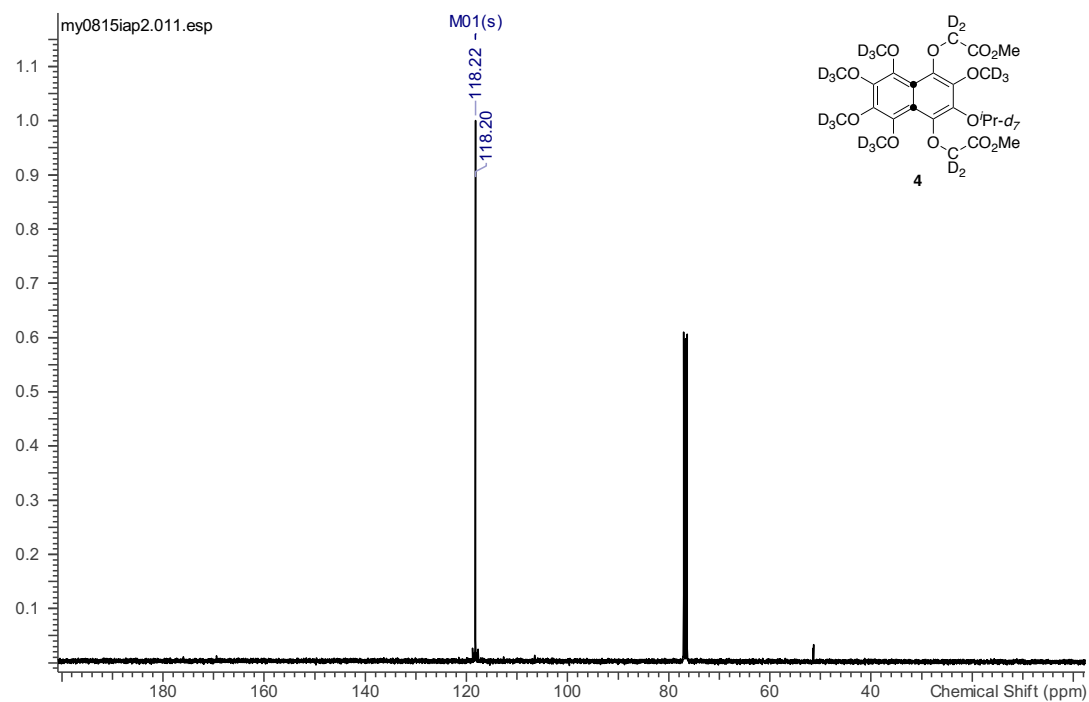

**S1.7  $^2\text{H}$  NMR (76.8 MHz,  $\text{CHCl}_3$ ) 2,2'-((1,2,3,4,6-Pentakis(methoxy- $d_3$ )-7-(propan-2-yl- $d_7$ )naphthalene-5,8-diyl)bis(oxy)) diacetic acid-4a,8a- $^{13}\text{C}_2$  (5)**

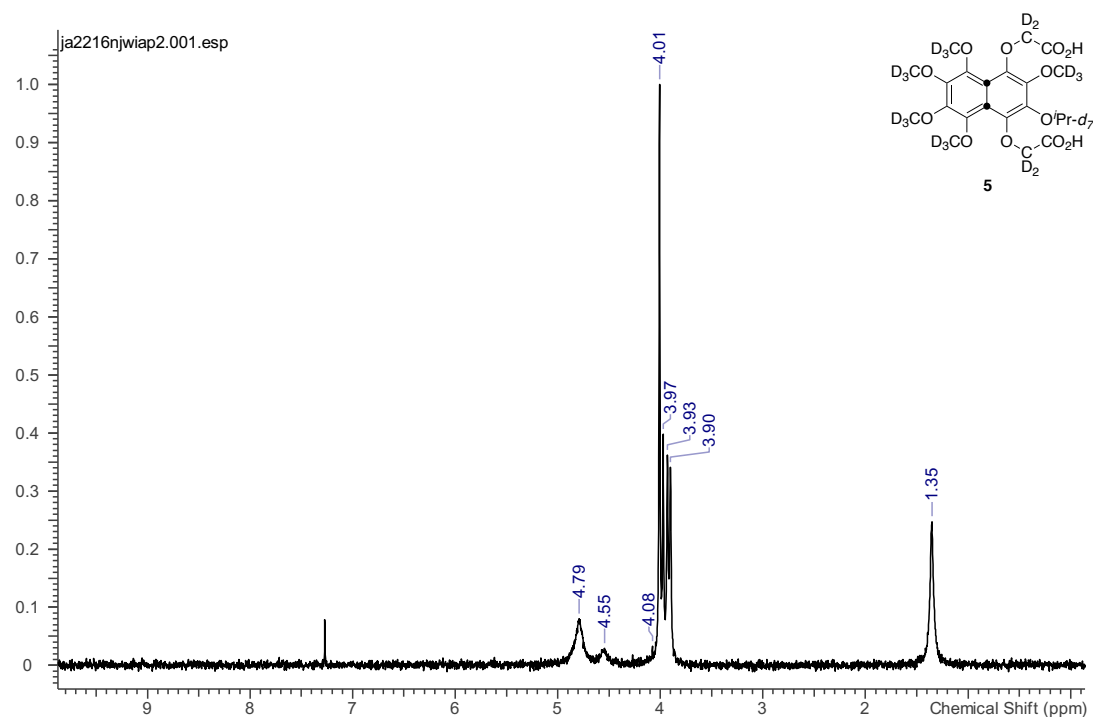

**S1.8  $^{13}\text{C}$  NMR (100 MHz,  $\text{CDCl}_3$ ) 2,2'-((1,2,3,4,6-Pentakis(methoxy- $d_3$ )-7-(propan-2-yl- $d_7$ )naphthalene-5,8-diyl)bis(oxy)) diacetic acid-4a,8a- $^{13}\text{C}_2$  (5)**

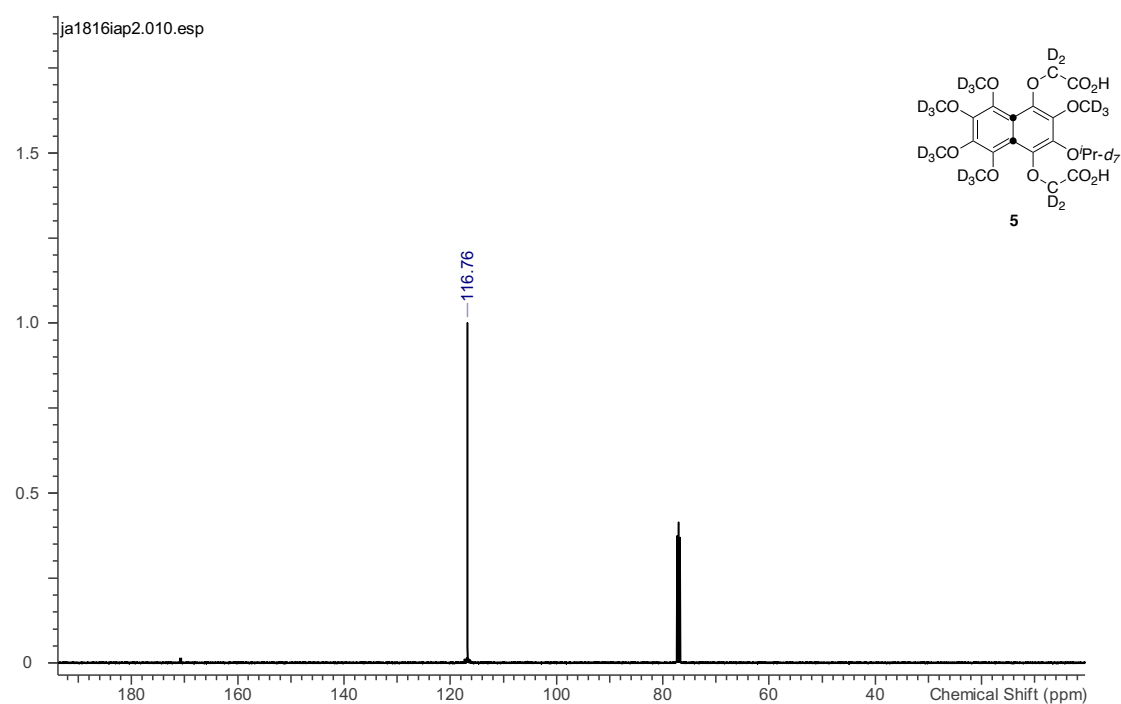

**S1.9  $^2\text{H}$  NMR (76.8 MHz,  $\text{H}_2\text{O}$ ) Sodium-2,2'-((1,2,3,4,6-pentakis(methoxy- $d_3$ )-7-(propan-2-yl-7)naphthalene-5,8-diyl)bis (oxy))diacetate-4a,8a- $^{13}\text{C}_2$  (1)**

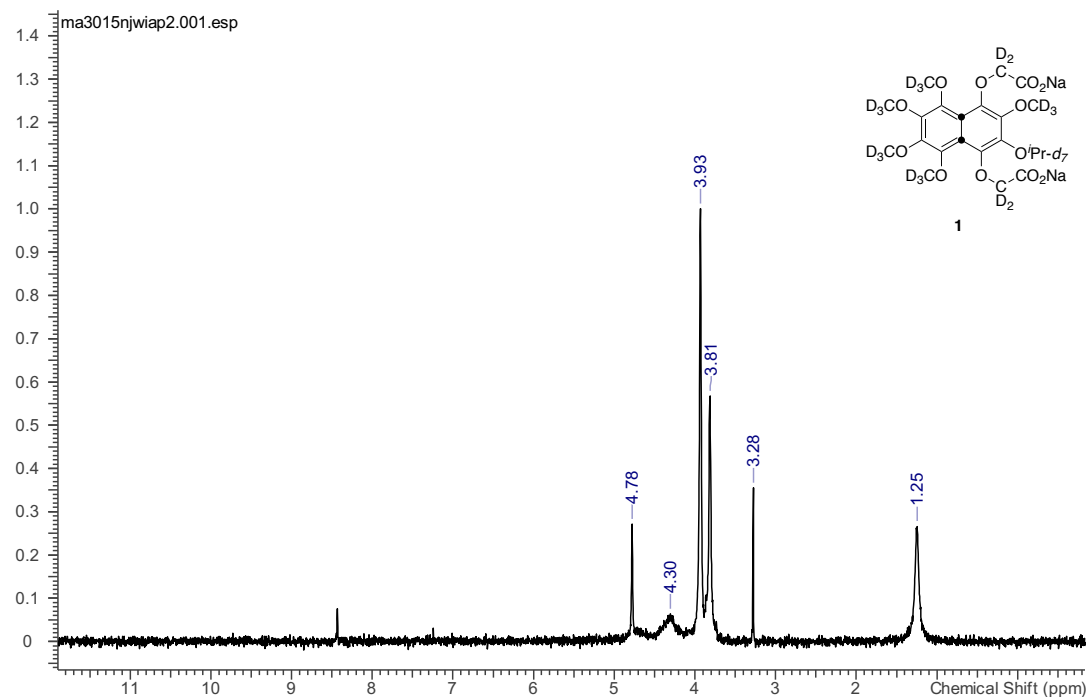

**S1.10  $^{13}\text{C}$  NMR (100 MHz,  $\text{H}_2\text{O}$ ) Sodium-2,2'-((1,2,3,4,6-pentakis(methoxy- $d_3$ )-7-(propan-2-yl- $d_7$ )naphthalene-5,8-diyl)bis (oxy))diacetate-4a,8a- $^{13}\text{C}_2$  (1)**

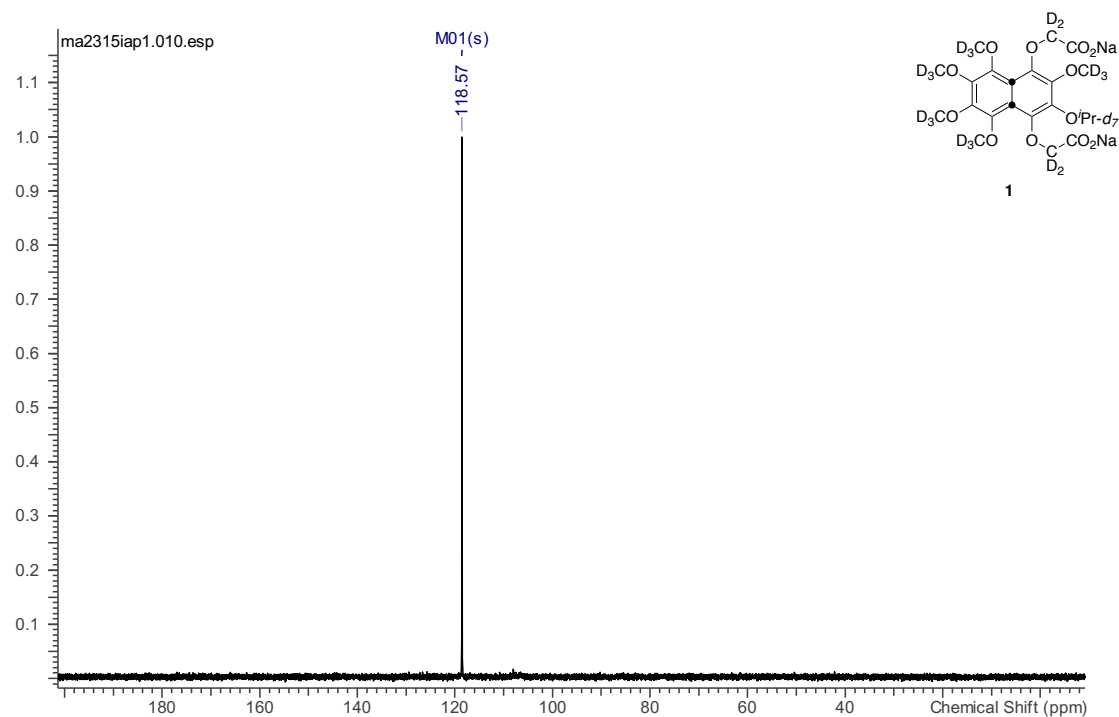

Supplement: c8cp00145f1.pdf [file c8cp00145f1.pdf]
